# Supplementary material for: Effects of Supplemental Calcium and Vitamin D on Circulating Biomarkers of Gut Barrier Function in Patients with Colon Adenoma: A Randomized Clinical Trial
Source: Oxford University Press journal article supplement (doi:10.1158/1940-6207.capr-20-0461), 2020-11-23
Supplement: 19406207capr200461-sup-250969_2_supp_6682564_q8w320.xlsx [file 19406207capr200461-sup-250969_2_supp_6682564_q8w320.xlsx]

## Sheet: Supplementary Table 1
	Supplementary Table 1: Blood 25-(OH)-Vitamin D Concentrations at baseline, year 1, and end of treatment according to treatment group assignmenta
		Baseline			Year 1			EOT			Abs. Tx Year 1b		Abs. Tx EOTc		∆ tx Year 1d	∆ tx EOTe
		n	Mean (SE)	P	n	Mean (SE)	P	n	Mean (SE)	P	Mean (SE)	P	Mean (SE)	P
	25(OH)-vitamin D, ng/mL
	Calcium	69	23.24 (0.68)	0.61	69	26.88 (0.68)	0.33	68	30.44 (0.68)	0.0004	0.45 (1.37)	0.74	2.97 (1.38)	0.03	1.01478	1.10445
	No calcium	66	22.75 (0.70)		66	25.93 (0.70)		63	26.98 (0.70)
	Vitamin D	88	24.72 (0.59)	0.01	87	32.47 (0.59)	<0.001	85	34.48 (0.60)	<0.001	8.89 (1.18)	<0.001	7.82 (1.19)	<0.001	1.38297	1.28305
	No Vitamin D	87	22.50 (0.59)		87	21.37 (0.59)		87	24.46 (0.59)
	Vit. D + Calcium	55	25.02 (0.77)	0.1	54	33.56 (0.77)	<0.001	54	36.24 (0.78)	<0.001	10.35 (1.55)	<0.001	8.96 (1.55)	<0.001	1.45404	1.31997
	Calcium only	54	23.22 (0.77)		54	21.42 (0.78)		55	25.48 (0.77)
	Abbreviations: Abs, absolute; EOT, end of treatment; mL, millilters; ng, nanograms; tx, treatment; Vit. D, vitamin D.
	aThe unadjusted effect of treatment agent on blood vitamin D levels was modeled using mixed linear models.
	bAbs. Tx Year 1= Absolute treatment effect at year 1= ([treatment group year 1] − [treatment group baseline]) − ([placebo group year 1] − [placebo group baseline]).
	cAbs. Tx EOT= Absolute treatment effect at the end of treatment= ([treatment group EOT] − [treatment group baseline]) − ([placebo group EOT] − [placebo group]).
	d∆ tx Year 1= Relative treatment effect at year 1= ([treatment group year 1]/[treatment group baseline])/([placebo group year 1]/[placebo group baseline]).
	e∆ tx EOT= Relative treatment effect at the end of treatment= ([treatment group EOT]/[treatment group baseline])/([placebo group EOT]/[placebo group baseline]).

## Sheet: Supplementary Table 2
	Supplementary Table 2: Effects of calcium and/or vitamin D supplementation on plasma concentration of gut barrier biomarkers at year 1 and end of treatment in the adjunct biomarker study participants (n = 175)a
		Baseline			Year 1			EOT			Abs. Diff. Year 1b		Abs. Diff. EOTc	Abs. Tx Year 1b		Abs. Tx EOTc		∆ tx Year 1d	∆ tx EOTe
		n	Mean (SE)	P	n	Mean (SE)	P	n	Mean (SE)	P	Mean (SE)		Mean (SE)	Mean (SE)	P	Mean (SE)	P
	Permeability Scoref
	Calcium	69	6.10 (0.20)	0.248	69	5.94 (0.20)	0.097	68	5.19 (0.20)	0.176	-0.16 (0.28)		-0.91 (0.28)	-0.14 (0.40)	0.72	-0.06 (0.40)	0.878	0.97529	0.9789
	No calcium	66	6.42 (0.20)		66	6.41 (0.20)		63	5.58 (0.21)		-0.01 (0.28)		-0.84 (0.29)
	Vitamin D	88	6.73 (0.17)	0.11	87	5.80 (0.17)	0.518	85	5.13 (0.18)	0.332	0.07(0.25)		-0.60 (0.25)	0.23 (0.35)	0.502	0.15 (0.35)	0.663	0.886395	0.870139
	No Vitamin D	87	6.13 (0.17)		87	5.96 (0.17)		87	5.37 (0.17)		-0.16 (0.25)		-0.75 (0.25)
	Vit. D + Calcium	55	5.52 (0.21)	0.461	54	5.52 (0.21)	0.783	54	4.98 (0.21)	0.579	0.002 (0.30)		-0.54 (0.30)	0.14 (0.42)	0.745	0.05 (0.42)	0.897	1.025	1.00553
	Calcium only	54	5.74(0.21)		54	5.60 (0.21)		55	5.15 (0.21)		-0.13 (0.30)		-0.59 (0.30)
	LPSg
	Calcium	69	2.65 (0.11)	0.345	69	2.58 (0.11)	0.166	68	2.22 (0.11)	0.232	-0.07 (0.15)		-0.43 (0.16)	-0.07 (0.22)	0.755	-0.04 (0.224)	0.851	0.973585	0.973303
	No calcium	66	2.80 (0.11)		66	2.80 (0.11)		63	2.41 (0.12)		-0.001 (0.16)		-0.39 (0.16)
	Vitamin D	88	2.45 (0.09)	0.071	87	2.50 (0.09)	0.466	85	2.20 (0.10)	0.346	0.05 (0.13)		-0.25 (0.13)	0.14 (0.19)	0.446	0.11 (0.19)	0.545	1.05573	1.0367
	No Vitamin D	87	2.69 (0.09)		87	2.60 (0.09)		87	2.33 (0.09)		-0.09 (0.13)		-0.37 (0.13)
	Vit. D + Calcium	55	2.30 (0.11)	0.096	54	2.31 (0.11)	0.251	54	2.08 (0.11)	0.194	0.01 (0.16)		-0.22 (0.16)	0.08 (0.23)	0.716	0.06 (0.23)	0.794	1.03247	1.01492
	Calcium only	54	2.57 (0.11)		54	2.50 (0.11)		55	2.29 (0.11)		-0.07 (0.16)		-0.28 (0.16)
	FLICg
	Calcium	69	3.45 (0.10)	0.231	69	3.36 (0.10)	0.091	68	2.98 (0.10)	0.191	-0.09 (0.15)		-0.47 (0.15)	-0.07 (0.21)	0.725	-0.02 (0.21)	0.926	0.979309	0.98911
	No calcium	66	3.63 (0.11)		66	3.61 (0.11)		63	3.17 (0.11)		-0.01 (0.15)		-0.45 (0.15)
	Vitamin D	88	3.28 (0.09)	0.254	87	3.30 (0.09)	0.644	85	2.93 (0.10)	0.395	0.02 (0.13)		-0.35 (0.13)	0.09 (0.19)	0.632	0.04 (0.19)	0.842	1.02706	1.00459
	No Vitamin D	87	3.43 (0.09)		87	3.36 (0.09)		87	3.05 (0.09)		-0.07 (0.13)		-0.39 (0.13)
	Vit. D + Calcium	55	3.22 (0.11)	0.755	54	3.21 (0.11)	0.521	54	2.91 (0.11)	0.78	-0.01 (0.16)		-0.31 (0.16)	0.05 (0.23)	0.814	-0.01 (0.23)	0.982	1.01613	1.00168
	Calcium only	54	3.17 (0.11)		54	3.11 (0.11)		55	2.86 (0.11)		-0.06 (0.16)		-0.31 (0.16)
	IgGg
	Calcium	69	2.86 (0.09)	0.276	69	2.78 (0.09)	0.072	68	2.42 (0.09)	0.061	-0.08 (0.12)		-0.45 (0.12)	-0.09 (0.17)	0.613	-0.10 (0.18)	0.565	0.972028	0.95791
	No calcium	66	3.00 (0.09)		66	3.00 (0.09)		63	2.65 (0.09)		0.004 (0.12)		-0.35 (0.13)
	Vitamin D	88	2.70 (0.08)	0.149	87	2.72 (0.08)	0.413	85	2.43 (0.08)	0.303	0.01 (0.11)		-0.27 (0.11)	0.07 (0.15)	0.659	0.04 (0.15)	0.775	1.02533	1.01339
	No Vitamin D	87	2.86 (0.08)		87	2.81 (0.08)		87	2.54 (0.08)		-0.05 (0.11)		-0.31 (0.11)
	Vit. D + Calcium	55	2.59 (0.09)	0.375	54	2.59 (0.09)	0.691	54	2.36 (0.09)	0.62	-0.002 (0.13)		-0.23 (0.13)	0.06 (0.18)	0.731	0.05 (0.18)	0.782	1.02652	1.01619
	Calcium only	54	2.71 (0.09)		54	2.64 (0.09)		55	2.43 (0.09)		-0.07 (0.13)		-0.28 (0.13)
	IgAg
	Calcium	69	3.24 (0.15)	0.361	69	3.16 (0.15)	0.24	68	2.78 (0.15)	0.474	-0.07 (0.21)		-0.46 (0.21)	-0.05 (0.30)	0.853	0.04 (0.30)	0.895	0.981029	1.00445
	No calcium	66	3.43 (0.15)		66	3.41 (0.15)		63	2.93 (0.15)		-0.02 (0.21)		-0.5 (0.21)
	Vitamin D	88	3.03 (0.13)	0.186	87	3.09 (0.13)	0.693	85	2.70 (0.13)	0.476	0.06 (0.18)		-0.33 (0.18)	0.17 (0.25)	0.513	0.11 (0.26)	0.671	1.07921	1.02963
	No Vitamin D	87	3.27 (0.13)		87	3.09 (0.13)		87	2.83 (0.13)		-0.11 (0.18)		-0.44 (0.18)
	Vit. D + Calcium	55	2.93 (0.16)	0.645	54	2.93 (0.16)	0.894	54	2.62 (0.16)	0.654	0.004 (0.22)		-0.31 (0.22)	0.07 (0.31)	0.818	0.003 (0.31)	0.993	1.03413	0.99611
	Calcium only	54	3.03 (0.16)		54	2.93 (0.16)		55	2.72 (0.16)		-0.07 (0.22)		-0.31 (0.22)
	LPS-IgG
	Calcium	69	1.14 (0.05)	0.5	69	1.09 (0.05)	0.168	68	0.94 (0.05)	0.145	-0.04 (0.08)		-0.2 (0.08)	-0.05 (0.11)	0.617	-0.06 (0.11)	0.57	0.948173	0.934503
	No calcium	66	1.19 (0.05)		66	1.20 (0.05)		63	1.05 (0.06)		0.01 (0.08)		-0.14 (0.08)
	Vitamin D	88	1.07 (0.05)	0.134	87	1.08 (0.05)	0.34	85	0.97 (0.05)	0.269	0.01 (0.07)		-0.10 (0.07)	0.04 (0.09)	0.702	0.03 (0.09)	0.787	1.0269	1.01015
	No Vitamin D	87	1.17 (0.05)		87	1.15 (0.05)		87	1.05 (0.05)		-0.03 (0.07)		-0.13 (0.07)
	Vit. D + Calcium	55	1.00 (0.06)	0.038	54	1.00 (0.06)	0.103	54	0.92 (0.06)	0.11	-0.003 (0.08)		-0.08 (0.08)	0.04 (0.12)	0.753	0.04 (0.11)	0.732	1.0354	1.02514
	Calcium only	54	1.17 (0.06)		54	1.13 (0.06)		55	1.05 (0.06)		-0.04 (0.08)		-0.12 (0.08)
	LPS-IgA
	Calcium	69	1.51 (0.08)	0.374	69	1.48 (0.08)	0.303	68	1.28 (0.08)	0.484	-0.03 (0.11)		-0.24 (0.11)	-0.02 (0.15)	0.921	0.02 (0.16)	0.9	0.986258	1.00351
	No calcium	66	1.61 (0.08)		66	1.60 (0.08)		63	1.36 (0.08)		-0.01 (0.11)		-0.25 (0.11)
	Vitamin D	88	1.38 (0.07)	0.127	87	1.42 (0.07)	0.712	85	1.23 (0.07)	0.571	0.04 (0.09)		-0.15 (0.09)	0.11 (0.13)	0.414	0.09 (0.13)	0.5	1.07127	1.05842
	No Vitamin D	87	1.52 (0.07)		87	1.46 (0.07)		87	1.28 (0.07)		-0.06 (0.09)		-0.24 (0.09)
	Vit. D + Calcium	55	1.30 (0.08)	0.388	54	1.32 (0.08)	0.65	54	1.16 (0.08)	0.49	0.01 (0.11)		-0.14 (0.11)	0.05 (0.16)	0.774	0.02 (0.16)	0.902	1.03762	1.00744
	Calcium only	54	1.40 (0.08)		54	1.37 (0.08)		55	1.24 (0.08)		-0.03 (0.11)		-0.16 (0.11)
	FLIC-IgG
	Calcium	69	1.73 (0.05)	0.256	69	1.69 (0.05)	0.109	68	1.48 (0.05)	0.099	-0.04 (0.07)		-0.25 (0.07)	-0.03 (0.10)	0.74	-0.04 (0.10)	0.705	0.982306	0.967775
	No calcium	66	1.81 (0.05)		66	1.80 (0.05)		63	1.60 (0.05)		-0.01 (0.07)		-0.21 (0.07)
	Vitamin D	88	1.63 (0.05)	0.38	87	1.63 (0.05)	0.698	85	1.46 (0.05)	0.557	0.01 (0.06)		-0.17 (0.07)	0.03 (0.09)	0.731	0.02 (0.09)	0.841	1.01807	1.00916
	No Vitamin D	87	1.69 (0.05)		87	1.66 (0.05)		87	1.50 (0.05)		-0.03 (0.06)		-0.19 (0.06)
	Vit. D + Calcium	55	1.59 (0.05)	0.49	54	1.59 (0.06)	0.299	54	1.44 (0.06)	0.399	0.001 (0.08)		-0.15 (0.08)	0.03 (0.11)	0.803	0.01 (0.11)	0.914	1.01987	1.01066
	Calcium only	54	1.54 (0.06)		54	1.51 (0.06)		55	1.38 (0.05)		-0.03 (0.08)		-0.16 (0.08)
	FLIC-IgA
	Calcium	69	1.72 (0.08)	0.381	69	1.68 (0.08)	0.215	68	1.50 (0.08)	0.495	-0.05 (0.11)		-0.22 (0.11)	-0.04 (0.15)	0.796	0.02 (0.15)	0.898	0.982141	1.01096
	No calcium	66	1.82 (0.08)		66	1.81 (0.08)		63	1.57 (0.08)		-0.01 (0.11)		-0.24 (0.11)
	Vitamin D	88	1.65 (0.07)	0.312	87	1.67 (0.07)	0.698	85	1.47 (0.07)	0.424	0.01 (0.09)		-0.18 (0.09)	0.06 (0.13)	0.66	0.02 (0.13)	0.885	1.04189	1.00587
	No Vitamin D	87	1.75 (0.07)		87	1.70 (0.07)		87	1.55 (0.07)		-0.05 (0.09)		-0.20 (0.09)
	Vit. D + Calcium	55	1.63 (0.08)	0.975	54	1.62 (0.08)	0.851	54	1.47 (0.08)	0.861	-0.01 (0.12)		-0.16 (0.12)	0.03 (0.17)	0.877	-0.02 (0.17)	0.919	1.01887	0.986577
	Calcium only	54	1.63 (0.08)		54	1.59 (0.08)		55	1.49 (0.08)		-0.04 (0.12)		-0.14 (0.12)
	Abbreviations: Diff, difference; EOT, end of treatment; FLIC, flagellin; IgA, immunoglobulin A; IgG, immunoglobulin G; LPS, lipopolysaccharide;
	tx, treatment; Vit. D, vitamin D.
	aThe effect of treatment agent on biomarker level was modeled using mixed linear models.
	bAbs. Tx Year 1= Absolute treatment effect at year 1= ([treatment group year 1] − [treatment group baseline]) − ([placebo group year 1] − [placebo group baseline]).
	cAbs. Tx EOT= Absolute treatment effect at the end of treatment= ([treatment group EOT] − [treatment group baseline]) − ([placebo group EOT] − [placebo group]).
	d∆ tx Year 1= Relative treatment effect at year 1= ([treatment group year 1]/[treatment group baseline])/([placebo group year 1]/[placebo group baseline]).
	e∆ tx EOT= Relative treatment effect at the end of treatment= ([treatment group EOT]/[treatment group baseline])/([placebo group EOT]/[placebo group baseline]).
	fPermeability score = (flagellin IgA + flagellin IgG + LPS IgA + LPS IgG).
	gLPS = (LPS IgA + LPS IgG); FLIC = (flagellin IgA + flagellin IgG); IgG = (flagellin IgG + LPS IgG); IgA = (flagellin IgA + LPS IgA).

## Sheet: Supplementary Table 3
	Supplementary Table 3: Effects of calcium and/or vitamin D supplementation on plasma concentration of gut barrier biomarkers according to treatment assignmenta
		Baseline			Year 1			EOT			Abs. Diff. Year 1b		Abs. Diff. EOTc		Abs. Tx Year 1b		Abs. Tx EOTc		∆ tx Year 1d	∆ tx EOTe
		n	Mean (SE)	P	n	Mean (SE)	P	n	Mean (SE)	P	Mean (SE)		Mean (SE)		Mean (SE)	P	Mean (SE)	P
	Permeability Scoref
	4-arm Groups:
	Calcium	33	6.42 (0.28)	0.391	33	6.11 (0.28)	0.267	33	5.43 (0.28)	0.407	-0.31 (0.40)		-0.99 (0.40)		-0.10 (0.57)	0.858	0.01 (0.57)	0.987	0.982226	0.992634
	Vitamin D	33	6.09 (0.28)	0.094	33	6.27 (0.28)	0.477	31	5.39 (0.29)	0.369	0.18 (0.40)		-0.69 (0.41)		0.38 (0.57)	0.495	0.30 (0.57)	0.597	1.06257	1.03871
	Vit. D + Calcium	36	5.81 (0.27)	0.016	36	5.79 (0.27)	0.053	35	4.97 (0.28)	0.048	-0.02 (0.38)		-0.84 (0.39)		0.19 (0.56)	0.732	0.16 (0.56)	0.769	1.02851	1.00393
	Placebo	33	6.76 (0.28)		33	6.55 (0.28)		32	5.76 (0.29)		-0.21 (0.40)		-1.00 (0.40)
	2-arm Groups:
	Vitamin D	19	4.97 (0.29)	0.443	18	4.98 (0.29)	0.667	19	5.00 (0.29)	0.482	0.01 (0.41)		0.03 (0.40)		-0.13 (0.56)	0.816	-0.03 (0.55)	0.959	0.972847	0.993275
	Placebo	21	4.67 (0.27)		21	4.81 (0.27)		22	4.73 (0.27)		0.14 (0.38)		0.06 (0.38)
	LPSg
	4-arm Groups:
	Calcium	33	2.89 (0.16)	0.985	33	2.74 (0.16)	0.868	33	2.40 (0.16)	0.993	-0.12(0.22)		-0.49 (0.22)		-0.03 (0.32)	0.917	0.002 (0.32)	0.995	0.98917	1
	Vitamin D	33	2.70 (0.16)	0.388	33	2.82 (0.16)	0.837	31	2.42 (0.16)	0.939	0.12 (0.22)		-0.29 (0.23)		0.24 (0.31)	0.45	0.21 (0.32)	0.511	1.08969	1.07929
	Vit. D + Calcium	36	2.43 (0.15)	0.034	36	2.43 (0.15)	0.121	35	2.05 (0.15)	0.114	0.01 (0.21)		-0.38 (0.22)		0.13 (0.31)	0.683	0.11 (0.31)	0.715	0.98917	1.01586
	Placebo	33	2.89 (0.16)		33	2.77 (0.16)		32	2.40 (0.16)		-0.12 (0.22)		-0.50 (0.23)
	2-arm Groups:
	Vitamin D	19	2.06 (0.15)	0.98	18	2.07 (0.15)	0.794	19	2.13 (0.15)	0.947	0.01 (0.21)		0.08 (0.21)		-0.05 (0.29)	0.866	0.02 (0.28)	0.948	0.976415	1.00472
	Placebo	21	2.06 (0.14)		21	2.12 (0.14)		22	2.12 (0.14)		0.06 (0.20)		0.06 (0.19)
	FLICg
	4-arm Groups:
	Calcium	33	3.53 (0.15)	0.105	33	3.37 (0.15)	0.052	33	3.03 (0.15)	0.116	-0.16 (0.21)		-0.50 (0.21)		-0.07 (0.30)	0.818	0.01 (0.30)	0.98	0.977405	0.988643
	Vitamin D	33	3.39 (0.15)	0.023	33	3.45 (0.15)	0.115	31	2.98 (0.15)	0.072	0.06 (0.21)		-0.41 (0.21)		0.15 (0.30)	0.616	0.09 (0.30)	0.755	1.04193	1.01248
	Vit. D + Calcium	36	3.38 (0.14)	0.018	36	3.36 (0.14)	0.04	35	2.93 (0.14)	0.036	-0.02 (0.20)		-0.45 (0.20)		0.06 (0.29)	0.825	0.05 (0.29)	0.864	1.01775	0.998441
	Placebo	33	3.87 (0.15)		33	3.78 (0.15)		32	3.36 (0.15)		-0.09 (0.21)		-0.50 (0.21)
	2-arm Groups:
	Vitamin D	19	2.92 (0.17)	0.204	18	2.92 (0.18)	0.357	19	2.87 (0.17)	0.275	0.003 (0.25)		-0.05 (0.25)		-0.08 (0.34)	0.812	-0.05 (0.34)	0.89	0.97026	0.982877
	Placebo	21	2.61 (0.17)		21	2.69 (0.17)		22	2.61 (0.16)		0.09 (0.23)		-0.001 (0.23)
	IgGg
	4-arm Groups:
	Calcium	33	2.97 (0.12)	0.44	33	2.82 (0.12)	0.145	33	2.45 (0.12)	0.102	-0.15 (0.18)		-0.51 (0.18)		-0.12 (0.25)	0.627	-0.15 (0.25)	0.536	0.958743	0.932905
	Vitamin D	33	2.89 (0.12)	0.219	33	2.93 (0.12)	0.404	31	2.55 (0.13)	0.29	0.04 (0.18)		-0.33 (0.18)		0.07 (0.25)	0.78	0.03 (0.25)	0.919	1.02372	0.997861
	Vit. D + Calcium	36	2.77 (0.12)	0.049	36	2.74 (0.12)	0.056	35	2.38 (0.12)	0.038	-0.02 (0.17)		-0.38 (0.17)		0.01 (0.24)	0.972	-0.03 (0.25)	0.918	0.998804	0.971684
	Placebo	33	3.11 (0.12)		33	3.08 (0.12)		32	2.75 (0.13)		-0.03 (0.18)		-0.36 (0.18)
	2-arm Groups:
	Vitamin D	19	2.26 (0.12)	0.837	18	2.28 (0.13)	0.619	19	2.32 (0.12)	0.729	0.02 (0.17)		0.06 (0.17)		-0.05 (0.24)	0.834	-0.02 (0.24)	0.923	0.978926	1.01467
	Placebo	21	2.29 (0.12)		21	2.36 (0.12)		22	2.38 (0.11)		0.07 (0.16)		0.09 (0.16)
	IgAg
	4-arm Groups:
	Calcium	33	3.45 (0.21)	0.486	33	3.29 (0.21)	0.528	33	2.97 (0.21)	0.882	-0.16 (0.30)		-0.48 (0.30)		0.02 (0.42)	0.963	0.16 (0.43)	0.7	1.00295	1.04331
	Vitamin D	33	3.20 (0.21)	0.127	33	3.34 (0.12)	0.643	31	2.84 (0.22)	0.56	0.14 (0.30)		-0.36 (0.30)		0.32 (0.42)	0.453	0.28 (0.43)	0.516	1.09774	1.07558
	Vit. D + Calcium	36	3.04 (0.20)	0.037	36	3.05 (0.20)	0.141	35	2.59 (0.21)	0.154	0.003 (0.29)		-0.45 (0.29)		0.18 (0.41)	0.661	0.19 (0.42)	0.65	1.05518	1.03252
	Placebo	33	3.66 (0.21)		33	3.48 (0.21)		32	3.02 (0.22)		-0.18 (0.30)		-0.64 (0.30)
	2-arm Groups:
	Vitamin D	19	2.71 (0.22)	0.261	18	2.71 (0.22)	0.398	19	2.68 (0.22)	0.263	-0.01 (0.31)		-0.03 (0.31)		-0.08 (0.43)	0.851	-0.01 (0.42)	0.99	0.971429	1.00155
	Placebo	21	2.38 (0.21)		21	2.45 (0.21)		22	2.35 (0.20)		0.07 (0.29)		-0.03 (0.29)
	LPS-IgG
	4-arm Groups:
	Calcium	33	1.24 (0.08)	0.589	33	1.16 (0.08)	0.923	33	1.00 (0.08)	0.705	-0.07 (0.11)		-0.24 (0.11)		-0.07 (0.15)	0.652	-0.10 (0.15)	0.517	0.943479	0.915012
	Vitamin D	33	1.20 (0.08)	0.857	33	1.23 (0.08)	0.634	31	1.06 (0.08)	0.82	0.03 (0.11)		-0.13 (0.11)		0.03 (0.15)	0.834	0.006 (0.16)	0.971	1.03376	1.00224
	Vit. D + Calcium	36	1.04 (0.07)	0.211	36	1.03 (0.07)	0.182	35	0.88 (0.07)	0.149	-0.01 (0.10)		-0.16 (0.11)		-0.01 (0.15)	0.953	-0.02 (0.15)	0.881	0.998849	0.960059
	Placebo	33	1.18 (0.08)		33	1.17 (0.08)		32	1.04 (0.08)		-0.005 (0.11)		-0.14 (0.11)
	2-arm Groups:
	Vitamin D	19	0.91 (0.09)	0.236	18	0.92 (0.09)	0.235	19	0.99 (0.09)	0.257	0.01 (0.13)		0.08 (0.13)		-0.003 (0.18)	0.989	0.008 (0.17)	0.964	1.00154	1.02052
	Placebo	21	1.06 (0.09)		21	1.07 (0.09)		22	1.13 (0.08)		0.01 (0.12)		0.07 (0.12)
	LPS-IgA
	4-arm Groups:
	Calcium	33	1.65 (0.11)	0.686	33	1.57 (0.11)	0.864	33	1.40 (0.11)	0.801	-0.08 (0.16)		-0.25 (0.16)		0.04 (0.22)	0.869	0.10 (0.22)	0.643	0.965508	0.860963
	Vitamin D	33	1.50 (0.11)	0.172	33	1.59 (0.11)	0.97	31	1.35 (0.11)	0.96	0.09 (0.16)		-0.15 (0.16)		0.21 (0.22)	0.348	0.20 (0.22)	0.358	1.07559	0.913235
	Vit. D + Calcium	36	1.38 (0.11)	0.03	36	1.40 (0.11)	0.196	35	1.16 (0.11)	0.206	0.02 (0.15)		-0.22 (0.15)		0.14 (0.22)	0.53	0.14 (0.22)	0.529	1.02941	0.852941
	Placebo	33	1.38 (0.11)		33	1.36 (0.11)		32	1.36 (0.11)		-0.12 (0.16)		-0.36 (0.16)
	2-arm Groups:
	Vitamin D	19	1.15 (0.10)	0.305	18	1.14 (0.10)	0.492	19	1.15 (0.10)	0.265	-0.003 (0.14)		-0.0002 (0.14)		-0.05 (0.20)	0.816	0.01 (0.19)	0.957	0.944099	1.0101
	Placebo	21	1.00 (0.10)		21	1.05 (0.10)		22	0.99 (0.09)		0.04 (0.14)		-0.01 (0.13)
	FLIC-IgG
	4-arm Groups:
	Calcium	33	1.73 (0.07)	0.059	33	1.65 (0.07)	0.017	33	1.46 (0.07)	0.017	-0.08 (0.10)		-0.27 (0.10)		-0.05 (0.15)	0.723	-0.05 (0.15)	0.71	0.968817	0.952507
	Vitamin D	33	1.69 (0.07)	0.022	33	1.70 (0.07)	0.054	31	1.49 (0.08)	0.041	0.01 (0.10)		-0.2 (0.10)		0.04 (0.15)	0.798	0.02 (0.15)	0.892	1.0218	0.995086
	Vit. D + Calcium	36	1.72 (0.07)	0.041	36	1.71 (0.07)	0.062	35	1.50 (0.07)	0.042	-0.01 (0.10)		-0.22 (0.10)		0.02 (0.14)	0.902	-0.002 (0.14)	0.986	1.00988	0.984292
	Placebo	33	1.93 (0.07)		33	1.90 (0.07)		32	1.71 (0.07)		-0.03 (0.10)		-0.22 (0.10)
	2-arm Groups:
	Vitamin D	19	1.35 (0.06)	0.188	18	1.35 (0.06)	0.453	19	1.34 (0.06)	0.333	0.01 (0.09)		-0.01 (0.09)		-0.05 (0.12)	0.696	-0.03 (0.12)	0.798	0.953488	0.976711
	Placebo	21	1.23 (0.06)		21	1.29 (0.06)		22	1.25 (0.06)		0.05 (0.08)		0.02 (0.08)
	FLIC-IgA
	4-arm Groups:
	Calcium	33	1.79 (0.11)	0.345	33	1.72 (0.11)	0.292	33	1.57 (0.11)	0.588	-0.08 (0.15)		-0.22 (0.15)		-0.02 (0.22)	0.939	0.06 (0.22)	0.779	0.991561	1.02504
	Vitamin D	33	1.70 (0.11)	0.114	33	1.74 (0.11)	0.389	31	1.49 (0.11)	0.28	0.05 (0.15)		-0.21 (0.16)		0.11 (0.22)	0.609	0.07 (0.22)	0.739	1.0562	1.02431
	Vit. D + Calcium	36	1.66 (0.10)	0.062	36	1.64 (0.10)	0.12	35	1.43 (0.11)	0.135	-0.02 (0.15)		-0.23 (0.15)		0.05 (0.21)	0.827	0.05 (0.22)	0.807	1.01948	1.00675
	Placebo	33	1.94 (0.11)		33	1.88 (0.11)		32	1.66 (0.11)		-0.06 (0.15)		-0.28 (0.15)
	2-arm Groups:
	Vitamin D	19	1.57 (0.14)	0.287	18	1.57 (0.14)	0.387	19	1.53 (0.13)	0.323	-0.003 (0.19)		-0.03 (0.19)		-0.03 (0.26)	0.895	-0.02 (0.26)	0.951	0.978571	0.98896
	Placebo	21	1.37 (0.13)		21	1.40 (0.13)		22	1.35 (0.12)		0.03 (0.18)		-0.02 (0.18)
	Abbreviations: Diff, difference; EOT, end of treatment; FLIC, flagellin; IgA, immunoglobulin A; IgG, immunoglobulin G; LPS, lipopolysaccharide; Tx, treatment;
	Vit. D, vitamin D.
	aThe unadjusted effect of treatment agent on biomarker level was modeled using mixed linear models.
	bAbs. Tx Year 1= Absolute treatment effect at year 1= ([treatment group year 1] − [treatment group baseline]) − ([placebo group year 1] − [placebo group baseline]).
	cAbs. Tx EOT= Absolute treatment effect at the end of treatment= ([treatment group EOT] − [treatment group baseline]) − ([placebo group EOT] − [placebo group]).
	d∆ tx Year 1= Relative treatment effect at year 1= ([treatment group year 1]/[treatment group baseline])/([placebo group year 1]/[placebo group baseline]).
	e∆ tx EOT= Relative treatment effect at the end of treatment= ([treatment group EOT]/[treatment group baseline])/([placebo group EOT]/[placebo group baseline]).
	fPermeability score = (flagellin IgA + flagellin IgG + LPS IgA + LPS IgG).
	gLPS = (LPS IgA + LPS IgG); FLIC = (flagellin IgA + flagellin IgG); IgG = (flagellin IgG + LPS IgG); IgA = (flagellin IgA + LPS IgA).

## Sheet: Supplementary Table 4
Supplementary Table 4: Effects of calcium and/or vitamin D supplementation on plasma concentration of gut barrier biomarkers in the adjunct biomarker study stratified by baseline characteristics
	Baseline			Year 1			EOT			Abs. tx Year 1b		Abs. tx EOTc		∆ tx Year 1d	∆ tx EOTe
Characteristics	n	Mean (SE)	P	n	Mean (SE)	P	n	Mean (SE)	P	Mean (SE)	P	Mean (SE)	P
Permeability Scoref
Stratified by baseline BMI (median; kg/m2)
<28.50
Calcium	29	5.91 (0.31)	0.121	29	5.79 (0.31)	0.141	28	4.75 (0.31)	0.028	0.03 (0.60)	0.955	-0.29 (0.61)	0.637	1.00259	0.926396
No calcium	31	6.57 (0.30)		31	6.42 (0.30)		31	5.70 (0.30)
Vitamin D	40	5.69 (0.26)	0.287	40	5.73 (0.27)	0.803	39	4.97 (0.26)	0.341	0.30 (0.51)	0.562	0.04 (0.52)	0.937	1.05202	0.998243
No vitamin D	40	6.08 (0.26)		41	5.82 (0.25)		41	5.32 (0.25)
Vit. D + calcium	26	5.38 (0.30)	0.738	28	5.37 (0.30)	0.973	29	4.69 (0.30)	0.619	0.13 (0.61)	0.83	-0.07 (0.61)	0.909	1.02412	0.98005
Calcium only	23	5.52 (0.32)		30	5.38 (0.31)		31	4.91 (0.31)
≥ 28.50
Calcium	40	6.24 (0.26)	0.881	40	6.05 (0.26)	0.355	40	5.50 (0.26)	0.918	-0.29 (0.53)	0.583	0.10 (0.54)	0.858	0.952887	1.0154
No calcium	35	6.29 (0.28)		35	6.40 (0.28)		32	5.46 (0.29)
Vitamin D	48	5.77 (0.24)	0.237	47	5.87 (0.24)	0.51	46	5.27 (0.24)	0.654	0.17 (0.48)	0.715	0.25 (0.48)	0.609	1.03069	1.03973
No vitamin D	47	6.17 (0.24)		46	6.09 (0.24)		46	5.42 (0.24)
Vit. D + calcium	29	5.65 (0.29)	0.538	28	5.67 (0.30)	0.779	29	5.23 (0.29)	0.807	0.13 (0.58)	0.817	0.15 (0.57)	0.793	1.02437	1.02466
Calcium only	31	5.90 (0.28)		30	5.78 (0.29)		31	5.33 (0.28)
Stratified by baseline regular aspirin use
< 4/week
Calcium	39	6.03 (0.27)	0.184	39	5.92 (0.27)	0.276	28	5.27 (0.27)	0.541	0.09 (0.53)	0.865	0.26 (0.53)	0.623	1.01278	1.03575
No calcium	41	6.53 (0.26)		41	6.33 (0.26)		31	5.51 (0.27)
Vitamin D	62	5.75 (0.21)	0.358	61	5.80 (0.21)	0.94	39	5.22 (0.21)	0.893	0.31 (0.45)	0.482	0.33 (0.45)	0.458	1.05217	1.0603
No vitamin D	48	6.05 (0.24)		48	5.80 (0.24)		41	5.18 (0.24)
Vit. D + calcium	39	5.47 (0.25)	0.895	38	5.51 (0.25)	0.79	25	5.07 (0.25)	0.824	0.15 (0.54)	0.779	0.13 (0.54)	0.803	1.00934	1.02738
Calcium only	30	5.52 (0.29)		30	5.41 (0.29)		24	4.98 (0.28)
≥ 4/week
Calcium	30	6.18 (0.30)	0.876	30	5.96 (0.30)	0.19	40	5.09 (0.30)	0.172	-0.51 (0.62)	0.413	-0.53 (0.62)	0.391	0.921637	0.904684
No calcium	25	6.25 (0.32)		25	6.54 (0.32)		32	5.69 (0.32)		0.29 (0.46)		-0.56 (0.46)
Vitamin D	26	5.68 (0.32)	0.182	26	5.81 (0.32)	0.351	46	4.94 (0.32)	0.097	0.16 (0.58)	0.775	-0.13 (0.58)	0.815	1.02784	0.962571
No vitamin D	39	6.22 (0.26)		39	6.19 (0.26)		46	5.62 (0.26)
Vit. D + calcium	16	5.63 (0.38)	0.443	16	5.55 (0.38)	0.542	29	4.78 (0.38)	0.238	0.08 (0.69)	0.912	-0.20 (0.69)	0.768	1.01107	0.950399
Calcium only	24	6.00 (0.31)		24	5.85 (0.31)		31	5.36 (0.31)
Stratified by baseline total calcium intake (median; dietary + supplements)
< 723.3 mg/d
Calcium	39	6.01 (0.25)	0.14	39	5.89 (0.25)	0.07	39	5.05 (0.25)	0.06	-0.13 (0.49)	0.8	-0.15 (0.49)	0.76	0.980033	0.960935
No calcium	44	6.53 (0.24)		44	6.53 (0.24)		44	5.71 (0.24)
Vitamin D	50	6.08 (0.23)	0.98	50	6.17 (0.23)	0.45	50	5.43 (0.23)	0.64	0.26 (0.46)	0.58	0.16 (0.46)	0.72	1.04394	1.0301
No vitamin D	46	6.09 (0.24)		47	5.92 (0.24)		47	5.28 (0.24)
Vit. D + calcium	28	6.03 (0.28)	0.09	28	5.89 (0.28)	0.2	28	5.21 (0.28)	0.41	-0.17 (0.57)	0.76	-0.36 (0.57)	0.53	0.96952	0.943524
Calcium only	24	5.34 (0.30)		25	5.38 (0.29)		25	4.89 (0.29)
≥ 723.3 mg/d
Calcium	30	6.21(0.31)	0.98	30	6.01 (0.32)	0.74	29	5.39 (0.32)	0.82	-0.15 (0.69)	0.82	0.13 (0.71)	0.86	0.974058	1.02442
No calcium	22	6.22 (0.37)		22	6.18 (0.37)		19	5.27 (0.40)
Vitamin D	38	5.27 (0.26)	0.01	37	5.31 (0.26)	0.06	35	4.70 (0.27)	0.04	0.19 (0.52)	0.71	0.11 (0.52)	0.83	1.03274	1.00068
No vitamin D	41	6.16 (0.25)		40	6.01 (0.25)		40	5.49 (0.25)
Vit. D + calcium	27	4.99 (0.30)	0.01	26	5.12 (0.31)	0.11	26	4.73 (0.31)	0.14	0.38 (0.60)	0.52	0.43 (0.59)	0.47	1.07213	1.21242
Calcium only	30	6.05 (0.29)		29	5.79 (0.29)		30	4.73 (0.31)
Stratified by baseline 25-(OH)-vitamin D concentrations (median)
< 21.60 ng/mL
Calcium	34	5.82 (0.28)	0.032	34	5.60 (0.28)	0.003	34	5.04 (0.28)	0.049	-0.32 (0.54)	0.548	0.06 (0.54)	0.914	0.946519	0.991397
No calcium	37	6.64 (0.26)		37	6.75 (0.26)		35	5.80 (0.27)
Vitamin D	37	5.80 (0.27)	0.197	37	5.90 (0.27)	0.535	36	5.17 (0.27)	0.396	0.23 (0.50)	0.637	0.15 (0.50)	0.761	1.04055	1.01849
No vitamin D	50	6.25 (0.23)		49	6.11 (0.23)		49	5.47 (0.23)
Vit. D + calcium	20	5.44 (0.32)	0.449	20	5.30 (0.32)	0.503	20	4.93 (0.32)	0.698	0.03 (0.59)	0.954	0.15 (0.59)	0.794	1.00389	1.02554
Calcium only	30	5.76 (0.26)		29	5.59 (0.27)		30	5.09 (0.26)
≥ 21.60 ng/mL
Calcium	35	6.37 (0.28)	0.588	35	6.27 (0.28)	0.476	34	5.35 (0.28)	0.916	0.07 (0.58)	0.904	-0.18 (0.59)	0.587	1.01228	0.972736
No calcium	29	6.15 (0.30)		29	5.98 (0.30)		28	5.31 (0.31)
Vitamin D	51	5.68 (0.23)	0.45	50	5.74 (0.23)	0.93	49	5.10 (0.24)	0.69	0.24 (0.50)	0.64	0.13 (0.50)	0.8	1.04209	1.01955
No vitamin D	37	5.95 (0.27)		38	5.77 (0.27)		38	5.24 (0.27)
Vit. D + calcium	35	5.56 (0.28)	0.733	34	5.65 (0.28)	0.953	34	5.01 (0.28)	0.647	0.17 (0.61)	0.777	-0.05 (0.61)	0.936	1.03063	0.987555
Calcium only	24	5.71 (0.34)		25	5.63 (0.33)		25	5.21 (0.33)
LPSg
Stratified by baseline BMI (median; kg/m2)
<28.50
Calcium	29	2.53 (0.16)	0.235	29	2.47 (0.16)	0.195	28	1.97 (0.16)	0.072	-0.02 (0.31)	0.938	-0.14 (0.31)	0.653	0.986896	0.912794
No calcium	31	2.79 (0.15)		31	2.76 (0.15)		31	2.38 (0.15)
Vitamin D	40	2.37 (0.13)	0.136	40	2.43 (0.13)	0.694	39	2.09 (0.13)	0.356	0.21 (0.26)	0.434	0.11 (0.26)	0.687	1.08684	1.03404
No vitamin D	40	2.65 (0.13)		41	2.50 (0.13)		41	2.26 (0.13)
Vit. D + calcium	26	2.23 (0.16)	0.344	26	2.24 (0.16)	0.692	25	1.97 (0.16)	0.47	0.13 (0.32)	0.693	0.05 (0.33)	0.873	1.05622	1.09865
Calcium only	23	2.45 (0.17)		24	2.33 (0.16)		24	1.97 (0.16)
≥ 28.50
Calcium	40	2.74 (0.15)	0.766	40	2.66 (0.15)	0.435	40	2.38 (0.15)	0.832	-0.11 (0.31)	0.732	0.02 (0.32)	0.955	0.960512	1.00087
No calcium	35	2.80 (0.16)		35	2.83 (0.16)		32	2.43 (0.17)
Vitamin D	48	2.51 (0.13)	0.266	47	2.57 (0.14)	0.524	46	2.29 (0.14)	0.636	0.09 (0.27)	0.741	0.12 (0.27)	0.657	1.03913	1.04214
No vitamin D	47	2.73 (0.14)		46	2.69 (0.14)		46	2.39 (0.14)
Vit. D + calcium	29	2.36 (0.16)	0.189	28	2.37 (0.16)	0.268	29	2.17 (0.16)	0.301	0.04 (0.32)	0.895	0.06 (0.32)	0.843	1.01141	1.0191
Calcium only	31	2.66 (0.16)		30	2.63 (0.16)		31	2.40 (0.16)
Stratified by baseline regular aspirin use
< 4/week
Calcium	39	2.58 (0.14)	0.134	39	2.54 (0.14)	0.208	38	2.24 (0.15)	0.404	0.05 (0.29)	0.866	0.13 (0.29)	0.653	1.01978	1.12016
No calcium	41	2.89 (0.14)		41	2.79 (0.14)		38	2.24 (0.15)
Vitamin D	62	2.46 (0.11)	0.275	61	2.50 (0.11)	0.936	59	2.24 (0.11)	0.953	0.20 (0.24)	0.408	0.19 (0.24)	0.419	1.01978	1.07798
No vitamin D	48	2.64 (0.13)		48	2.49 (0.13)		48	2.23 (0.13)
Vit. D + calcium	39	2.23 (0.13)	0.223	38	2.26 (0.13)	0.51	38	2.07 (0.13)	0.438	0.11 (0.28)	0.694	0.09 (0.28)	0.751	1.04738	1.03278
Calcium only	30	2.47 (0.15)		30	2.39 (0.15)		31	2.22 (0.15)
≥ 4/week							31
Calcium	30	2.74 (0.17)	0.747	30	2.63 (0.17)	0.502	30	2.19 (0.17)	0.405	-0.25 (0.36)	0.482	-0.29 (0.36)	0.414	0.911861	0.885858
No calcium	25	2.66 (0.19)		25	2.80 (0.19)		25	2.40 (0.19)
Vitamin D	26	2.42 (0.18)	0.157	26	2.51 (0.18)	0.312	26	2.11 (0.18)	0.146	0.09 (0.33)	0.775	-0.01 (0.33)	0.977	1.04098	0.978664
No vitamin D	39	2.75 (0.15)		39	2.74 (0.15)		39	2.45 (0.15)
Vit. D + calcium	16	2.47 (0.22)	0.443	16	2.43 (0.22)	0.493	16	2.09 (0.22)	0.339	0.02 (0.40)	0.954	-0.05 (0.40)	0.893	1.00625	0.960402
Calcium only	24	2.69 (0.18)		24	2.63 (0.18)		24	2.37 (0.18)
Stratified by baseline total calcium intake (median; dietary + supplements)
< 723.3 mg/d
Calcium	39	2.59 (0.14)	0.23	39	2.54 (0.14)	0.15	39	2.13 (0.14)	0.11	-0.05 (0.28)	0.86	-0.08 (0.28)	0.78	0.980695	0.946592
No calcium	44	2.82 (0.13)		44	2.82 (0.13)		44	2.45 (0.13)
Vitamin D	50	2.57 (0.12)	0.32	50	2.65 (0.12)	0.8	50	2.34 (0.12)	0.8	0.22 (0.25)	0.38	0.23 (0.25)	0.37	1.09062	1.08865
No vitamin D	46	2.75 (0.13)		47	2.60 (0.13)		47	2.30 (0.13)
Vit. D + calcium	28	2.51 (0.16)	0.97	28	2.49 (0.16)	0.87	28	2.20 (0.16)	0.9	0.03 (0.33)	0.93	-0.04 (0.33)	0.9	1.01228	0.982617
Calcium only	24	2.50 (0.17)		25	2.45 (0.17)		25	2.23 (0.17)
≥ 723.3 mg/d
Calcium	30	2.73 (0.18)	0.93	30	2.63 (0.18)	0.65	29	2.32 (0.18)	0.98	-0.10 (0.39)	0.8	0.03 (0.40)	0.94	0.96337	1.00733
No calcium	22	2.75 (0.21)		22	2.75 (0.21)		19	2.32 (0.22)
Vitamin D	38	2.30 (0.14)	0.09	37	2.31 (0.14)	0.15	35	2.00 (0.15)	0.07	0.04 (0.28)	0.88	-0.03 (0.28)	0.91	1.01594	0.969049
No vitamin D	41	2.63 (0.14)		40	2.60 (0.14)		40	2.36 (0.14)
Vit. D + calcium	27	2.08 (0.16)	0.03	26	2.12 (0.16)	0.06	26	1.94 (0.16)	0.08	0.13 (0.31)	0.68	0.15 (0.31)	0.62	1.05133	1.25962
Calcium only	30	2.62 (0.15)		29	2.54 (0.15)		30	1.94 (0.16)
Stratified by baseline 25-(OH)-vitamin D concentrations (median)
< 21.60 ng/mL
Calcium	34	2.55 (0.16)	0.124	34	2.45 (0.16)	0.03	34	2.17 (0.16)	0.14	-0.14 (0.32)	0.652	0.01 (0.32)	0.977	0.944444	0.979814
No calcium	37	2.89 (0.16)		37	2.94 (0.16)		35	2.51 (0.16)
Vitamin D	37	2.50 (0.15)	0.228	37	2.56 (0.15)	0.669	36	2.22 (0.15)	0.5	0.16 (0.29)	0.583	0.11 (0.29)	0.712	1.05878	1.03537
No vitamin D	50	2.74 (0.13)		49	2.65 (0.13)		49	2.35 (0.13)
Vit. D + calcium	20	2.22 (0.18)	0.109	20	2.17 (0.18)	0.174	20	1.98 (0.18)	0.24	0.06 (0.34)	0.869	0.10 (0.33)	0.762	1.01658	1.02607
Calcium only	30	2.60 (0.15)		29	2.50 (0.15)		30	2.26 (0.15)
≥ 21.60 ng/mL
Calcium	35	2.75 (0.15)	0.734	35	2.70 (0.15)	0.67	34	2.26 (0.15)	0.94	0.02 (0.31)	0.952	-0.09 (0.31)	0.77	1.00815	0.965997
No calcium	29	2.68 (0.16)		29	2.61 (0.16)		28	2.28 (0.16)
Vitamin D	51	2.42 (0.12)	0.25	50	2.46 (0.12)	0.66	49	2.19 (0.12)	0.57	0.13 (0.26)	0.61	0.11 (0.26)	0.68	1.05255	1.03932
No vitamin D	37	2.63 (0.14)		38	2.54 (0.14)		38	2.29 (0.14)
Vit. D + calcium	35	2.35 (0.15)	0.425	34	2.39 (0.15)	0.652	34	2.13 (0.15)	0.417	0.08 (0.32)	0.804	-0.002 (0.32)	0.995	1.02923	0.988426
Calcium only	24	2.53 (0.18)		25	2.50 (0.17)		25	2.32 (0.17)
FLICg
Stratified by baseline BMI (median; kg/m2)
<28.50
Calcium	29	3.38 (0.17)	0.087	29	3.32 (0.17)	0.143	28	2.78 (0.17)	0.021	0.06 (0.33)	0.859	-0.14 (0.33)	0.661	1.01169	0.936444
No calcium	31	3.78 (0.16)		31	3.67 (0.16)		31	3.32 (0.16)
Vitamin D	40	3.31 (0.14)	0.586	40	3.30 (0.14)	0.931	39	2.88 (0.15)	0.389	0.09 (0.29)	0.745	-0.06 (0.29)	0.822	1.03001	0.975298
No vitamin D	40	3.43 (0.14)		41	3.32 (0.14)		41	3.06 (0.14)
Vit. D + calcium	26	3.14 (0.16)	0.759	28	3.12 (0.16)	0.748	29	2.73 (0.17)	0.837	0.003 (0.33)	0.993	-0.12 (0.34)	0.717	1.00015	0.960122
Calcium only	23	3.07 (0.17)		30	3.05 (0.17)		31	2.78 (0.17)
≥ 28.50
Calcium	40	3.50 (0.13)	0.961	40	3.39 (0.13)	0.356	40	3.12 (0.13)	0.652	-0.19 (0.27)	0.492	0.08 (0.27)	0.773	0.946867	1.02676
No calcium	35	3.49 (0.14)		35	3.57 (0.14)		32	3.03 (0.15)
Vitamin D	48	3.25 (0.12)	0.293	47	3.30 (0.13)	0.572	46	2.97 (0.13)	0.733	0.09 (0.25)	0.735	0.13 (0.25)	0.62	1.02733	1.0375
No vitamin D	47	3.44 (0.13)		46	3.40 (0.13)		46	3.03 (0.13)
Vit. D + calcium	29	3.29 (0.16)	0.859	28	3.29 (0.16)	0.538	29	3.06 (0.16)	0.542	0.09 (0.31)	0.767	0.09 (0.31)	0.774	1.02857	1.0285
Calcium only	31	3.24 (0.15)		30	3.15 (0.15)		31	2.93 (0.15)
Stratified by baseline regular aspirin use
< 4/week
Calcium	39	3.45 (0.15)	0.349	39	3.39 (0.15)	0.461	28	3.03 (0.15)	0.774	0.04 (0.29)	0.889	0.13 (0.29)	0.654	1.01314	1.03408
No calcium	41	3.65 (0.14)		41	3.54 (0.14)		31	3.10 (0.15)
Vitamin D	62	3.29 (0.12)	0.54	61	3.30 (0.12)	0.953	39	2.98 (0.12)	0.853	0.12 (0.25)	0.635	0.14 (0.25)	0.574	1.03658	1.03343
No vitamin D	48	3.40 (0.13)		48	3.29 (0.12)		41	2.98 (0.12)
Vit. D + calcium	39	3.24 (0.14)	0.363	38	3.25 (0.14)	0.271	25	3.00 (0.14)	0.258	0.04 (0.30)	0.89	0.05 (0.30)	0.878	1.01642	1.02322
Calcium only	30	3.05 (0.16)		30	3.01 (0.16)		24	2.76 (0.16)
≥ 4/week
Calcium	30	3.44 (0.14)	0.475	30	3.33 (0.14)	0.056	40	2.91 (0.14)	0.066	-0.25 (0.30)	0.394	-0.24 (0.30)	0.425	0.931787	0.925638
No calcium	25	3.60 (0.16)		25	3.74 (0.16)		32	3.29 (0.16)
Vitamin D	26	3.25 (0.16)	0.29	26	3.31 (0.16)	0.476	46	2.82 (0.16)	0.097	0.07 (0.29)	0.807	-0.13 (0.29)	0.669	1.02437	0.949808
No vitamin D	39	3.47 (0.13)		39	3.45 (0.13)		46	3.17 (0.13)
Vit. D + calcium	16	3.16 (0.19)	0.534	16	3.12 (0.19)	0.682	29	2.68 (0.19)	0.224	0.05 (0.35)	0.88	-0.15 (0.35)	0.673	1.018	0.941704
Calcium only	24	3.32 (0.16)		24	3.22 (0.16)		31	2.99 (0.16)
Stratified by baseline total calcium intake (median; dietary + supplements)
< 723.3 mg/d
Calcium	39	3.42 (0.13)	0.12	39	3.35 (0.13)	0.05	39	2.91 (0.13)	0.05	-0.08 (0.26)	0.76	-0.07 (0.26)	0.78	0.979532	0.965368
No calcium	44	3.71 (0.13)		44	3.71 (0.13)		44	3.27 (0.13)
Vitamin D	50	3.52 (0.12)	0.34	50	3.52 (0.12)	0.25	50	3.09 (0.12)	0.54	0.03 (0.25)	0.9	-0.06 (0.25)	0.8	1.00904	0.986835
No vitamin D	46	3.35 (0.13)		47	3.32 (0.13)		47	2.98 (0.13)
Vit. D + calcium	28	3.52 (0.15)	0.002	28	3.41 (0.15)	0.03	28	3.01 (0.15)	0.09	-0.20 (0.30)	0.51	-0.31 (0.30)	0.3	0.938993	0.916424
Calcium only	24	2.84 (0.16)		25	2.93 (0.15)		25	2.65 (0.15)
≥ 723.3 mg/d
Calcium	30	3.48 (0.17)	0.95	30	3.38 (0.17)	0.87	29	3.07 (0.17)	0.68	-0.06 (0.36)	0.87	0.09 (0.37)	0.8	0.985464	1.03769
No calcium	22	3.47 (0.19)		22	3.42 (0.19)		19	2.95 (0.21)
Vitamin D	38	2.97 (0.14)	0.004	37	3.00 (0.14)	0.04	35	2.71 (0.15)	0.04	0.15 (0.28)	0.59	0.14 (0.28)	0.61	1.04565	1.03236
No vitamin D	41	3.53 (0.13)		40	3.41 (0.14)		40	3.12 (0.14)
Vit. D + calcium	27	2.91 (0.16)	0.02	26	3.00 (0.17)	0.26	26	2.79 (0.17)	0.28	0.26 (0.32)	0.42	0.28 (0.32)	0.39	1.08469	1.08533
Calcium only	30	3.43 (0.15)		29	3.26 (0.16)		30	3.03 (0.15)
Stratified by baseline 25-(OH)-vitamin D concentrations (median)
< 21.60 ng/mL
Calcium	34	3.27 (0.13)	0.011	34	3.15 (0.13)	0.001	34	2.86 (0.13)	0.024	-0.18 (0.26)	0.489	0.05 (0.26)	0.851	0.950628	0.996905
No calcium	37	3.75 (0.13)		37	3.80 (0.13)		35	3.29 (0.13)
Vitamin D	37	3.30 (0.13)	0.237	37	3.33 (0.13)	0.458	36	2.96 (0.14)	0.361	0.08 (0.25)	0.757	0.05 (0.25)	0.856	1.02367	1.00909
No vitamin D	50	3.51 (0.12)		49	3.46 (0.12)		49	3.12 (0.12)
Vit. D + calcium	20	3.22 (0.16)	0.759	20	3.13 (0.16)	0.837	20	2.95 (0.16)	0.58	-0.02 (0.30)	0.944	0.05 (0.30)	0.862	0.99407	1.01938
Calcium only	30	3.16 (0.13)		29	3.09 (0.14)		30	2.84 (0.13)
≥ 21.60 ng/mL
Calcium	35	3.62 (0.16)	0.52	35	3.57 (0.16)	0.387	34	3.09 (0.16)	0.795	0.05 (0.33)	0.875	-0.09 (0.33)	0.79	1.01545	0.977545
No calcium	29	3.47 (0.17)		29	3.37 (0.17)		28	3.03 (0.17)
Vitamin D	51	3.27 (0.13)	0.77	50	3.27 (0.13)	0.82	49	2.91 (0.13)	0.85	0.11 (0.29)	0.71	0.02 (0.29)	0.94	1.03096	1.00454
No vitamin D	37	3.33 (0.16)		38	3.23 (0.15)		38	2.95 (0.15)
Vit. D + calcium	35	3.22 (0.16)	0.89	34	3.26 (0.16)	0.599	34	2.88 (0.16)	0.955	0.09 (0.35)	0.785	-0.05 (0.35)	0.89	1.0286	0.98416
Calcium only	24	3.18 (0.19)		25	3.13 (0.18)		25	2.89 (0.18)
Abbreviations: BMI, body mass index; d, day; FLIC, flagellin; LPS, lipopolysaccharide; mg, milligram; mL, millilters; ng, nanograms; no. number; NSAID, nonsteroidal
anti-inflammatory drug.
aStratified by median levels of BMI, aspirin use, calcium intake, and vitamin d intake.
bAbs. tx Year 1= Absolute treatment effect at year 1= ([treatment group year 1] – [treatment group baseline]) – ([placebo group year 1] – [placebo group baseline]).
cAbs. tx EOT= Absolute treatment effect at the end of treatment= ([treatment group EOT] – [treatment group baseline]) – ([placebo group EOT] – [placebo group baseline]).
d∆ tx Year 1= Relative treatment effect at year 1= ([treatment group year 1] / [treatment group baseline]) / ([placebo group year 1] / [placebo group baseline]).
e∆ tx EOT= Relative treatment effect at the end of treatment= ([treatment group EOT] / [treatment group baseline]) / ([placebo group EOT] / [placebo group baseline]).
fPermeability score= (flagellin IgA + flagellin IgG + LPS IgA + LPS IgG).
gLPS= (LPS IgA + LPS IgG); FLIC= (flagellin IgA + flagellin IgG)

## Sheet: Supplementary Table 5
	Supplementary Table 5: Mean baseline plasma levels of gut permeability biomarkers by demographic and lifestyle characteristics of study participants a
			LPS			FLIC			IgG			IgA				LPS-IgG			LPS-IgA			FLIC-IgG			FLIC-IgA
	Characteristics	N	Mean (95% CI)	P		Mean (95% CI)	P		Mean (95% CI)	P		Mean (95% CI)	P	Characteristics	N	Mean (95% CI)	P		Mean (95% CI)	P		Mean (95% CI)	P		Mean (95% CI)	P
	Age, yrs													Age, yrs
	≤55	57	2.57 (2.34-2.81)			3.38 (3.15-3.62)			2.79 (2.60-2.98)			3.17 (2.84-3.50)		≤55	57	1.16 (1.05-1.28)			1.41 (1.24-1.58)			1.63 (1.51-1.74)			1.75 (1.58-1.93)
	55.1-60	44	2.59 (2.32-2.85)			3.34 (3.07-3.60)			2.78 (2.57-2.99)			3.14 (2.78-3.51)		55.1-60	44	1.13 (1.00-1.26)			1.45 (1.26-1.64)			1.65 (1.52-1.78)			1.69 (1.50-1.88)
	60.1-65	38	2.42 (2.14-2.71)			3.21 (2.93-3.50)			2.61 (2.38-2.84)			3.03 (2.63-3.42)		60.1-65	38	1.02 (0.88-1.16)			1.40 (1.20-1.61)			1.58 (1.45-1.72)			1.63 (1.42-1.83)
	>65	36	2.63 (2.33-2.92)	0.743		3.37 (3.07-3.67)	0.97		2.73 (2.49-2.97)	0.641		3.27 (2.85-3.68)	0.593	>65	36	1.13 (0.99-1.28)	0.556		1.50 (1.28-1.71)	0.39		1.60 (1.45-1.74)	0.859		1.77 (1.56-1.98)	0.86
	Sex													Sex
	Men	109	2.71 (2.54-2.87)			3.52 (3.35-3.69)			2.94 (2.80-3.08)			3.29 (3.06-3.53)		Men	109	1.16 (1.08-1.24)			1.54 (1.42-1.67)			1.77 (1.69-1.85)			1.75 (1.63-1.87)
	Women	66	2.40 (2.19-2.62)	0.029		3.14 (2.93-3.36)	0.0007		2.72 (2.53-2.91)	0.0005		3.01 (2.71-3.30)	0.134	Women	66	1.07 (0.97-1.18)	0.202		1.33 (1.18-1.48)	0.031		1.47 (1.36-1.57)	0.0004		1.68 (1.52-1.83)	0.47
	Center													Center
	GA	103	2.43 (2.26-2.61)			3.22 (3.05-3.40)			2.71 (2.57-2.85)			2.94 (2.70-3.19)		GA	103	1.08 (1.00-1.17)			1.35 (1.22-1.48)			1.63 (1.54-1.71)			1.59 (1.47-1.72)
	SC	72	2.68 (2.47-2.89)	0.071		3.44 (3.23-3.65)	0.11		2.76 (2.60-2.93)	0.625		3.36 (3.07-3.64)	0.03	SC	72	1.15 (1.05-1.26)	0.285		1.52 (1.38-1.67)	0.076		1.61 (1.51-1.71)	0.784		1.83 (1.68-1.98)	0.02
	BMI, kg/m2													BMI, kg/m2
	<22.5	8	1.81 (1.22-2.40)			2.79 (2.19-3.39)			2.20 (1.72-2.68)			2.39 (1.56-3.23)		<22.5	8	0.80 (0.50-1.09)			1.01 (0.58-1.44)			1.41 (1.11-1.70)			1.38 (0.94-1.82)
	22.5-25	24	2.43 (2.09-2.76)			3.41 (3.07-3.76)			2.77 (2.49-3.04)			3.07 (2.59-3.55)		22.5-25	24	1.08 (0.92-1.25)			1.34 (1.09-1.59)			1.68 (1.51-1.85)			1.73 (1.48-1.98)
	25-27.5	36	2.75 (2.46-3.03)			3.52 (3.23-3.82)			2.93 (2.70-3.16)			3.34 (2.93-3.75)		25-27.5	36	1.21 (1.07-1.35)			1.54 (1.33-1.75)			1.72 (1.58-1.86)			1.80 (1.59-2.01)
	27.5-30	45	2.62 (2.37-2.86)			3.27 (3.02-3.53)			2.76 (2.56-2.96)			3.13 (2.77-3.48)		27.5-30	45	1.18 (1.05-1.30)			1.44 (1.26-1.62)			1.58 (1.46-1.71)			1.69 (1.50-1.87)
	30-35	38	2.20 (1.93-2.47)			3.04 (2.76-3.32)			2.48 (2.26-2.70)			2.76 (2.37-3.14)		30-35	38	0.96 (0.83-1.10)			1.24 (1.04-1.44)			1.52 (1.38-1.66)			1.52 (1.32-1.72)
	>35	24	3.11 (2.78-3.45)	0.057		3.73 (3.38-4.07)	0.539		2.96 (2.69-3.24)	0.72		3.87 (3.40-4.35)	0.109	>35	24	1.26 (1.10-1.43)	0.371		1.85 (1.60-2.10)	0.042		1.70 (1.53-1.87)	0.755		2.03 (1.77-2.28)	0.29
	Smoking status													Smoking status
	Never	100	2.61 (2.43-2.79)			3.33 (3.15-3.51)			2.84 (2.70-2.98)			3.10 (2.85-3.35)		Never	100	1.19 (1.10-1.28)			1.42 (1.29-1.55)			1.65 (1.57-1.74)			1.68 (1.55-1.81)
	Former	63	2.52 (2.29-2.75)			3.27 (3.04-3.51)			2.54 (2.36-2.72)			3.25 (2.93-3.58)		Former	63	1.03 (0.92-1.15)			1.49 (1.32-1.65)			1.51 (1.40-1.62)			1.77 (1.60-1.94)
	Smoker	12	2.28 (1.78-2.78)	0.564		3.60 (3.10-4.11)	0.498		2.82 (2.42-3.21)	0.132		3.07 (2.37-3.77)	0.571	Smoker	12	0.94 (0.70-1.19)	0.057		1.34 (0.97-1.70)	0.51		1.87 (1.63-2.11)	0.052		1.73 (1.37-2.10)	0.59
	Alcohol intake, drinks/d													Alcohol intake, drinks/d
	Non drinker	61	2.65 (2.42-2.88)			3.32 (3.09-3.55)			2.85 (2.67-3.03)			3.12 (2.80-3.44)		Non drinker	61	1.21 (1.10-1.32)			1.44 (1.27-1.61)			1.64 (1.53-1.75)			1.68 (1.51-1.85)
	0.1-0.5	38	2.52 (2.23-2.81)			3.41 (3.11-3.70)			2.79 (2.56-3.02)			3.14 (2.73-3.54)		0.1-0.5	38	1.11 (0.97-1.25)			1.41 (1.20-1.62)			1.68 (1.54-1.82)			1.73 (1.51-1.94)
	0.51-1.0	32	2.45 (2.12-2.78)			3.44 (3.11-3.77)			2.59 (2.33-2.85)			3.30 (2.84-3.76)		0.51-1.0	32	0.96 (0.80-1.12)			1.49 (1.26-1.73)			1.63 (1.47-1.78)			1.81 (1.57-2.05)
	1.01-2.0	26	2.51 (2.15-2.87)			3.32 (2.96-3.68)			2.76 (2.48-3.04)			3.07 (2.58-3.57)		1.01-2.0	26	1.12 (0.95-1.29)			1.39 (1.13-1.65)			1.63 (1.46-1.80)			1.69 (1.43-1.94)
	>2.0	18	2.45 (2.02-2.87)	0.952		3.05 (2.63-3.48)	0.675		2.34 (2.01-2.68)	0.363		3.16 (2.57-3.75)	0.987	>2.0	18	0.98 (0.78-1.19)	0.26		1.46 (1.16-1.77)	0.975		1.36 (1.16-1.56)	0.085		1.69 (1.39-2.00)	0.99
	Intake of red or processed meat, serv/d													Intake of red or processed meat, serv/d
	0	14	2.27 (1.79-2.75)			3.03 (2.55-3.50)			2.58 (2.19-2.97)			2.71 (2.05-3.37)		0	14	0.96 (0.73-1.20)			1.31 (0.96-1.65)			1.62 (1.38-1.85)			1.41 (1.07-1.75)
	0.1-0.5	50	2.57 (2.32-2.81)			3.18 (2.93-3.42)			2.70 (2.50-2.90)			3.04 (2.70-3.38)		0.1-0.5	50	1.16 (1.04-1.28)			1.41 (1.23-1.59)			1.55 (1.43-1.66)			1.63 (1.46-1.81)
	0.51-1.0	48	2.65 (2.39-2.90)			3.63 (3.38-3.88)			2.76 (2.55-2.96)			3.52 (3.17-3.86)		0.51-1.0	48	1.08 (0.95-1.20)			1.57 (1.39-1.75)			1.68 (1.56-1.80)			1.95 (1.77-2.13)
	>1	63	2.54 (2.30-2.77)	0.175		3.29 (3.06-3.52)	0.006		2.79 (2.60-2.97)	0.305		3.04 (2.72-3.36)	0.014	>1	63	1.15 (1.04-1.27)	0.25		1.38 (1.22-1.55)	0.12		1.63 (1.52-1.75)	0.164		1.65 (1.49-1.82)	0.01
	Regular NSAID and/or aspirin use (≥ 4 times/week)													NSAID and/or aspirin use ≥ 4 times/week
	No	54	2.54 (2.30-2.79)			3.33 (3.08-3.57)			2.77 (2.58-2.97)			3.10 (2.76-3.44)		No	54	1.14 (1.02-1.26)			1.41 (1.23-1.58)			1.64 (1.52-1.76)			1.69 (1.51-1.87)
	Yes	121	2.56 (2.40-2.72)	0.917		3.33 (3.17-3.49)	0.974		2.72 (2.59-2.85)	0.647		3.17 (2.95-3.40)	0.717	Yes	121	1.11 (1.03-1.19)	0.71		1.45 (1.33-1.57)	0.69		1.61 (1.53-1.69)	0.7		1.72 (1.60-1.84)	0.76
	No. of adenomas													No. of adenomas
	1	126	2.58 (2.42-2.74)			3.37 (3.21-3.53)			2.75 (2.62-2.88)			3.21 (2.98-.343)		1	126	1.12 (1.04-1.20)			1.47 (1.35-1.58)			1.63 (1.55-1.71)			1.74 (1.62-1.85)
	≥2	49	2.48 (2.22-2.74)	0.49		3.22 (2.96-3.48)	0.331		2.70 (2.49-2.91)	0.702		3.00 (2.64-3.36)	0.329	≥2	49	1.12 (0.99-1.25)	0.99		1.36 (1.17-1.55)	0.33		1.58 (1.46-1.71)	0.513		1.64 (1.45-1.83)	0.36
	Advanced adenoma													Advanced adenoma
	No	128	2.58 (2.42-2.75)			3.34 (3.18-3.50)			2.79 (2.66-2.92)			3.14 (2.91-3.36)		No	128	1.14 (1.07-1.22)			1.44 (1.32-1.56)			1.64 (1.57-1.72)			1.70 (1.58-1.81)
	Yes	43	2.47 (2.19-2.75)	0.477		3.31 (3.03-3.59)	0.868		2.60 (2.38-2.82)	0.154		3.18 (2.79-3.57)	0.852	Yes	43	1.04 (0.91-1.18)	0.201		1.43 (1.22-1.63)	0.904		1.56 (1.42-1.69)	0.288		1.75 (1.55-1.96)	0.63
	Serrated polyps													Serrated polyps
	No	390	2.57 (2.41-2.73)			3.29 (3.13-3.45)			2.73 (2.61-2.86)			3.12 (2.90-3.34)		No	390	1.13 (1.06-1.21)			1.44 (1.32-1.55)			1.60 (1.52-1.68)			1.69 (1.57-1.80)
	Yes	131	2.51 (2.25-2.78)	0.72		3.45 (3.19-3.72)	0.3		2.74 (2.53-2.96)	0.95		3.22 (2.85-3.59)	0.65	Yes	131	1.07 (0.94-1.20)	0.41		1.44 (1.25-1.63)	0.95		1.67 (1.54-1.80)	0.34		1.78 (1.59-1.97)	0.41
	Diabetes													Diabetes
	No	153	2.57 (2.43-2.72)			3.34 (3.19-3.49)			2.74 (2.63-2.86)			3.17 (2.96-3.37)		No	153	1.13 (1.05-1.20)			1.45 (1.34-1.56)			1.62 (1.55-1.69)			1.72 (1.61-1.83)
	Yes	22	2.43 (2.05-2.81)	0.481		3.29 (2.90-3.67)	0.805		2.69 (2.38-2.99)	0.731		3.03 (2.50-3.56)	0.627	Yes	22	1.07 (0.88-1.26)	0.59		1.36 (1.08-1.63)	0.54		1.62 (1.43-1.80)	0.983		1.67 (1.39-1.94)	0.74
	Abbreviations: BMI, body mass index; d, day; FLIC, flagellin; IgA, immunoglobulin A; IgG, immunoglobulin G; IL-6, interleukin 6; IL-10, interleukin 10; LPS,
	lipopolysaccharide; No., number; NSAID, nonsteroidal anti-inflammatory drug; serv, servings; TNFA, tumor necrosis factors alpha; yrs, years.
